# Supplementary material for: Antibiotic-Resistant Bacteria across a Wastewater Treatment Plant
Source: MDPI journal article supplement (doi:10.3390/applmicrobiol4010025), 2024-02-12
Supplement: s1 [file s1]

## Supplementary Tables and Figures

**Table S1.** Isolation conditions and NCBI closest described species for each isolate.

| Isolate ID | Isolation Media | Isolation Antibiotic | Sampling site | Identification           | Closest described |                     |                                                                      |
|------------|-----------------|----------------------|---------------|--------------------------|-------------------|---------------------|----------------------------------------------------------------------|
|            |                 |                      |               |                          | Accession         | % Pairwise Identity | Description                                                          |
| E10        | MacConkey       | None                 | B             | <i>Aeromonas</i> sp.     | KT934808.1        | 100                 | <i>Aeromonas media</i> strain CECT 4232                              |
| E114       | MacConkey       | Ciprofloxacin        | A             | <i>Aeromonas</i> sp.     | LC164819.1        | 99.84               | <i>Aeromonas hydrophila</i> subsp. <i>hydrophila</i> strain JCM 1027 |
| E115       | MacConkey       | Ciprofloxacin        | A             | <i>Aeromonas</i> sp.     | LC164819.1        | 99.84               | <i>Aeromonas hydrophila</i> subsp. <i>hydrophila</i> strain JCM 1027 |
| E112       | MacConkey       | Imipenem             | B             | <i>Brevundimonas</i> sp. | AJ227779.1        | 100                 | <i>Brevundimonas vancouveriensis</i> strain LMG 2337                 |
| E73        | MacConkey       | Ciprofloxacin        | C             | <i>Citrobacter</i> sp.   | CP077405.1        | 99.92               | <i>Citrobacter braakii</i> strain FDAARGOS 1421                      |
| E78        | MacConkey       | Ciprofloxacin        | C             | <i>Citrobacter</i> sp.   | CP077405.1        | 99.62               | <i>Citrobacter braakii</i> strain FDAARGOS 1421                      |
| E116       | MacConkey       | Ciprofloxacin        | A             | <i>Citrobacter</i> sp.   | CP077262.1        | 99.59               | <i>Citrobacter pasteurii</i> strain FDAARGOS 1424                    |
| E11        | MacConkey       | None                 | B             | <i>Comamonas</i> sp.     | NR_043859.1       | 100                 | <i>Comamonas odontotermitis</i> strain Dant 3-8                      |
| E1         | Mannitol        | None                 | D             | <i>Enterococcus</i> sp.  | MH544642.1        | 100                 | <i>Enterococcus faecium</i> strain NBRC 100486                       |
| E82        | Slanetz         | None                 | A             | <i>Enterococcus</i> sp.  | LC071830.1        | 100                 | <i>Enterococcus faecalis</i> strain JCM 5803                         |
| E83        | Slanetz         | None                 | A             | <i>Enterococcus</i> sp.  | LC097067.1        | 100                 | <i>Enterococcus hirae</i> strain JCM 8729                            |
| E84        | Slanetz         | None                 | A             | <i>Enterococcus</i> sp.  | LC071830.1        | 100                 | <i>Enterococcus faecalis</i> strain JCM 5803                         |
| E88        | Slanetz         | None                 | B             | <i>Enterococcus</i> sp.  | LC097070.1        | 99.82               | <i>Enterococcus pseudoavium</i> strain JCM 8732                      |
| E93        | Slanetz         | None                 | D             | <i>Enterococcus</i> sp.  | LC071830.1        | 100                 | <i>Enterococcus faecalis</i> strain JCM 5803                         |
| E95        | Slanetz         | None                 | D             | <i>Enterococcus</i> sp.  | LC071830.1        | 100                 | <i>Enterococcus faecalis</i> strain JCM 5803                         |
| E102       | Mannitol        | None                 | B             | <i>Enterococcus</i> sp.  | LC071830.1        | 100                 | <i>Enterococcus faecalis</i> strain JCM 5803                         |
| E154       | Slanetz         | None                 | A             | <i>Enterococcus</i> sp.  | LC097067.1        | 100                 | <i>Enterococcus hirae</i> strain JCM 8729                            |
| E157       | Slanetz         | None                 | B             | <i>Enterococcus</i> sp.  | LC071830.1        | 100                 | <i>Enterococcus faecalis</i> strain JCM 5803                         |
| E158       | Slanetz         | None                 | B             | <i>Enterococcus</i> sp.  | MH544642.1        | 100                 | <i>Enterococcus faecium</i> strain NBRC 100486                       |
| E159       | Slanetz         | None                 | B             | <i>Enterococcus</i> sp.  | LC071830.1        | 100                 | <i>Enterococcus faecalis</i> strain JCM 5803                         |
| E160       | Slanetz         | None                 | D             | <i>Enterococcus</i> sp.  | LC071830.1        | 100                 | <i>Enterococcus faecalis</i> strain JCM 5803                         |
| E161       | Slanetz         | None                 | D             | <i>Enterococcus</i> sp.  | LC071830.1        | 100                 | <i>Enterococcus faecalis</i> strain JCM 5803                         |
| E164       | Mannitol        | None                 | A             | <i>Enterococcus</i> sp.  | NR_114742.1       | 99.93               | <i>Enterococcus faecium</i> strain DSM 20477                         |
| E170       | Mannitol        | None                 | A             | <i>Enterococcus</i> sp.  | LC097067.1        | 100                 | <i>Enterococcus hirae</i> strain JCM 8729                            |
| E171       | Mannitol        | None                 | A             | <i>Enterococcus</i> sp.  | LC071830.1        | 100                 | <i>Enterococcus faecalis</i> strain JCM 5803                         |

|             |           |               |   |                             |                 |       |                                                        |
|-------------|-----------|---------------|---|-----------------------------|-----------------|-------|--------------------------------------------------------|
| <b>E179</b> | Mannitol  | None          | B | <i>Enterococcus</i> sp.     | LC071830.<br>1  | 100   | <i>Enterococcus faecalis</i> strain JCM 5803           |
| <b>E183</b> | Mannitol  | Vancomycin    | B | <i>Enterococcus</i> sp.     | LC097066.<br>1  | 99.92 | <i>Enterococcus gallinarum</i> strain JCM 8728         |
| <b>E186</b> | Mannitol  | Vancomycin    | B | <i>Enterococcus</i> sp.     | CP068132.<br>1  | 100   | <i>Enterococcus casseliflavus</i> strain FDAARGOS_1120 |
| <b>E187</b> | Mannitol  | Vancomycin    | B | <i>Enterococcus</i> sp.     | CP068132.<br>1  | 100   | <i>Enterococcus casseliflavus</i> strain FDAARGOS_1120 |
| <b>E188</b> | Mannitol  | Vancomycin    | B | <i>Enterococcus</i> sp.     | CP068132.<br>1  | 100   | <i>Enterococcus casseliflavus</i> strain FDAARGOS_1120 |
| <b>E195</b> | Mannitol  | None          | D | <i>Enterococcus</i> sp.     | LC097066.<br>1  | 99.92 | <i>Enterococcus gallinarum</i> strain JCM 8728         |
| <b>E208</b> | Slanetz   | Vancomycin    | C | <i>Enterococcus</i> sp.     | NR_11401<br>5.1 | 100   | <i>Enterococcus thailandicus</i> strain NBRC 101867    |
| <b>E209</b> | Slanetz   | Vancomycin    | C | <i>Enterococcus</i> sp.     | LC096212.<br>1  | 99.92 | <i>Enterococcus avium</i> strain JCM 8722              |
| <b>E142</b> | MacConkey | Ciprofloxacin | D | <i>Klebsiella</i> sp.       | CP022823.<br>1  | 99.43 | <i>Klebsiella quasivariicola</i> strain KPN1705        |
| <b>E167</b> | Mannitol  | None          | A | <i>Klebsiella</i> sp.       | MN326677.<br>1  | 99.84 | <i>Klebsiella aerogenes</i> KCTC 2190                  |
| <b>E79</b>  | MacConkey | Ciprofloxacin | C | <i>Kluyvera</i> sp.         | NR_02880<br>2.1 | 99.33 | <i>Kluyvera intermedia</i> strain 256                  |
| <b>E130</b> | MacConkey | Ciprofloxacin | B | <i>Providencia</i> sp.      | LS483467.<br>1  | 99.46 | <i>Providencia alcalifaciens</i> strain NCTC10286      |
| <b>E9</b>   | MacConkey | None          | B | <i>Pseudomonas</i> sp.      | KX186942.<br>1  | 100   | <i>Pseudomonas extremaustralis</i> strain DSM 17835    |
| <b>E125</b> | MacConkey | Imipenem      | A | <i>Pseudomonas</i> sp.      | CP081966.<br>1  | 99.92 | <i>Pseudomonas mosselii</i> strain DSM 17497           |
| <b>E127</b> | MacConkey | Imipenem      | A | <i>Pseudomonas</i> sp.      | NR_04328<br>9.1 | 99.57 | <i>Pseudomonas otitidis</i> strain MCC10330            |
| <b>E137</b> | MacConkey | Imipenem      | B | <i>Pseudomonas</i> sp.      | MK796437.<br>1  | 100   | <i>Pseudomonas aeruginosa</i> strain JCM 5962          |
| <b>E144</b> | MacConkey | Imipenem      | D | <i>Pseudomonas</i> sp.      | NR_04328<br>9.1 | 99.92 | <i>Pseudomonas otitidis</i> strain MCC10330            |
| <b>E145</b> | MacConkey | Imipenem      | D | <i>Pseudomonas</i> sp.      | MK796437.<br>1  | 100   | <i>Pseudomonas aeruginosa</i> strain JCM 5962          |
| <b>E146</b> | MacConkey | Imipenem      | D | <i>Pseudomonas</i> sp.      | AJ876736.<br>1  | 99.69 | <i>Pseudomonas guezenei</i> strain RA26T               |
| <b>E150</b> | MacConkey | Imipenem      | C | <i>Pseudomonas</i> sp.      | MK796437.<br>1  | 100   | <i>Pseudomonas aeruginosa</i> strain JCM 5962          |
| <b>E8</b>   | MacConkey | None          | A | <i>Raoultella</i> sp.       | NR_02499<br>6.1 | 100   | <i>Raoultella planticola</i> ATCC 33531                |
| <b>E74</b>  | MacConkey | Ciprofloxacin | C | <i>Raoultella</i> sp.       | NR_11450<br>2.1 | 99.92 | <i>Raoultella ornithinolytica</i> strain ATCC 31898    |
| <b>E148</b> | MacConkey | Ciprofloxacin | C | <i>Raoultella</i> sp.       | NR_04479<br>9.1 | 99.85 | <i>Raoultella ornithinolytica</i> strain CIP 103364    |
| <b>E113</b> | MacConkey | Ciprofloxacin | A | <i>Shigella</i> sp.         | CP026802.<br>1  | 100   | <i>Shigella sonnei</i> strain ATCC 29930               |
| <b>E126</b> | MacConkey | Imipenem      | A | <i>Stenotrophomonas</i> sp. | LC507977.<br>1  | 99.63 | [ <i>Pseudomonas</i> ] <i>geniculata</i> JCM 13324     |

**Table S2.** Results of the antimicrobial susceptibility testing. S – susceptible, R – resistant, I – intermediate, – – not determined.

| Isolate ID | Identification              | Ampicillin | Cefotaxime | Imipenem | Tetracycline | Vancomycin | Gentamicin | Ciprofloxacin |    |   |    |    |    |    |    |
|------------|-----------------------------|------------|------------|----------|--------------|------------|------------|---------------|----|---|----|----|----|----|----|
| E10        | <i>Aeromonas</i> sp.        | 0          | S          | 36       | S            | 36         | S          | 22            | -  | S | 16 | S  | 29 |    |    |
| E114       | <i>Aeromonas</i> sp.        | 0          | S          | 40       | S            | 25         | S          | 26            | -  | I | 14 | S  | 25 |    |    |
| E115       | <i>Aeromonas</i> sp.        | 0          | S          | 35       | S            | 28         | I          | 13            | -  | S | 15 | R  | 15 |    |    |
| E112       | <i>Brevundimonas</i> sp.    | 0          |            | 11       |              | 10         |            | 12            | -  |   | 15 |    | 33 |    |    |
| E73        | <i>Citrobacter</i> sp.      | R          | 0          | I        | 24           | S          | 29         | R             | 0  | - | I  | 14 | R  | 9  |    |
| E78        | <i>Citrobacter</i> sp.      | I          | 14         | S        | 33           | S          | 34         | S             | 20 | - | S  | 15 | S  | 25 |    |
| E116       | <i>Citrobacter</i> sp.      | I          | 15         | I        | 25           | S          | 23         | I             | 14 | - | I  | 13 | I  | 19 |    |
| E11        | <i>Comamonas</i> sp.        | 0          |            | 35       |              | 33         |            | 15            | -  |   | 13 |    | 21 |    |    |
| E1         | <i>Enterococcus</i> sp.     | S          | 24         |          | 23           |            | 10         | R             | 14 | S | 25 |    | 19 | I  | 17 |
| E82        | <i>Enterococcus</i> sp.     | S          | 25         |          | 18           |            | 17         | R             | 10 | I | 16 |    | 11 | S  | 23 |
| E83        | <i>Enterococcus</i> sp.     | S          | 30         |          | 25           |            | 32         | S             | 20 | S | 21 |    | 10 | S  | 25 |
| E84        | <i>Enterococcus</i> sp.     | S          | 35         |          | 25           |            | 28         | R             | 12 | S | 17 |    | 10 | S  | 23 |
| E88        | <i>Enterococcus</i> sp.     | S          | 31         |          | 29           |            | 40         | S             | 21 | S | 25 |    | 15 | S  | 27 |
| E93        | <i>Enterococcus</i> sp.     | S          | 30         |          | 17           |            | 27         | S             | 20 | S | 17 |    | 10 | S  | 21 |
| E95        | <i>Enterococcus</i> sp.     | S          | 29         |          | 20           |            | 30         | I             | 17 | I | 16 |    | 11 | I  | 20 |
| E102       | <i>Enterococcus</i> sp.     | S          | 25         |          | 16           |            | 24         | I             | 17 | I | 16 |    | 11 | I  | 19 |
| E154       | <i>Enterococcus</i> sp.     | S          | 30         |          | 25           |            | 28         | I             | 18 | S | 20 |    | 12 | S  | 25 |
| E157       | <i>Enterococcus</i> sp.     | S          | 26         |          | 23           |            | 28         | S             | 20 | I | 16 |    | 11 | S  | 21 |
| E158       | <i>Enterococcus</i> sp.     | S          | 25         |          | 19           |            | 22         | S             | 19 | S | 19 |    | 14 | I  | 20 |
| E159       | <i>Enterococcus</i> sp.     | S          | 23         |          | 20           |            | 25         | I             | 16 | S | 18 |    | 9  | I  | 20 |
| E160       | <i>Enterococcus</i> sp.     | S          | 26         |          | 26           |            | 25         | R             | 12 | S | 17 |    | 10 | I  | 20 |
| E161       | <i>Enterococcus</i> sp.     | S          | 27         |          | 26           |            | 30         | R             | 12 | S | 18 |    | 11 | S  | 21 |
| E164       | <i>Enterococcus</i> sp.     | S          | 29         |          | 24           |            | 25         | R             | 11 | S | 19 |    | 11 | I  | 17 |
| E170       | <i>Enterococcus</i> sp.     | S          | 25         |          | 15           |            | 20         | R             | 11 | S | 18 |    | 10 | S  | 21 |
| E171       | <i>Enterococcus</i> sp.     | S          | 23         |          | 19           |            | 25         | R             | 11 | I | 16 |    | 9  | S  | 28 |
| E179       | <i>Enterococcus</i> sp.     | S          | 20         |          | 18           |            | 20         | R             | 11 | I | 16 |    | 8  | S  | 21 |
| E183       | <i>Enterococcus</i> sp.     | S          | 25         |          | 16           |            | 26         | S             | 20 | S | 18 |    | 14 | S  | 22 |
| E186       | <i>Enterococcus</i> sp.     | S          | 22         |          | 12           |            | 20         | I             | 18 | S | 17 |    | 11 | S  | 22 |
| E187       | <i>Enterococcus</i> sp.     | S          | 25         |          | 12           |            | 24         | S             | 19 | S | 17 |    | 13 | I  | 20 |
| E188       | <i>Enterococcus</i> sp.     | S          | 24         |          | 15           |            | 25         | S             | 20 | S | 19 |    | 13 | S  | 24 |
| E195       | <i>Enterococcus</i> sp.     | S          | 24         |          | 14           |            | 24         | S             | 19 | S | 17 |    | 13 | S  | 21 |
| E208       | <i>Enterococcus</i> sp.     | S          | 25         |          | 18           |            | 25         | I             | 15 | S | 18 |    | 15 | S  | 21 |
| E209       | <i>Enterococcus</i> sp.     | S          | 24         |          | 23           |            | 34         | S             | 19 | S | 23 |    | 13 | S  | 30 |
| E142       | <i>Klebsiella</i> sp.       | R          | 0          | S        | 30           | S          | 25         | R             | 10 |   | -  | I  | 14 | R  | 11 |
| E167       | <i>Klebsiella</i> sp.       | R          | 0          | I        | 24           | R          | 18         | S             | 16 |   | -  | I  | 14 | S  | 25 |
| E79        | <i>Kluyvera</i> sp.         | R          | 12         | S        | 28           | S          | 31         | S             | 19 |   | -  | I  | 14 | I  | 19 |
| E130       | <i>Providencia</i> sp.      | R          | 0          | S        | 36           | S          | 25         | R             | 7  |   | -  | S  | 16 | S  | 23 |
| E9         | <i>Pseudomonas</i> sp.      |            | 0          |          | 0            | I          | 25         |               | 14 |   | -  |    | 11 | R  | 18 |
| E125       | <i>Pseudomonas</i> sp.      |            | 0          |          | 14           | I          | 20         |               | 11 |   | -  |    | 14 | I  | 27 |
| E127       | <i>Pseudomonas</i> sp.      |            | 0          |          | 20           | R          | 19         |               | 16 |   | -  |    | 19 | I  | 37 |
| E137       | <i>Pseudomonas</i> sp.      |            | 0          |          | 15           | S          | 24         |               | 8  |   | -  | I  | 13 | S  | 35 |
| E144       | <i>Pseudomonas</i> sp.      |            | 0          |          | 22           | R          | 17         |               | 16 |   | -  |    | 16 | I  | 40 |
| E145       | <i>Pseudomonas</i> sp.      |            | 0          |          | 16           | S          | 26         |               | 9  |   | -  | I  | 13 | S  | 35 |
| E146       | <i>Pseudomonas</i> sp.      |            | 0          |          | 23           | I          | 21         |               | 16 |   | -  |    | 18 | I  | 32 |
| E150       | <i>Pseudomonas</i> sp.      |            | 0          |          | 18           | S          | 21         |               | 8  |   | -  | R  | 12 | S  | 37 |
| E8         | <i>Raoultella</i> sp.       | R          | 0          | S        | 30           | S          | 32         | S             | 21 |   | -  | S  | 15 | S  | 33 |
| E74        | <i>Raoultella</i> sp.       | R          | 0          | S        | 31           | S          | 29         | S             | 19 |   | -  | I  | 14 | S  | 21 |
| E148       | <i>Raoultella</i> sp.       | R          | 0          | S        | 29           | S          | 30         | R             | 9  |   | -  | S  | 15 | I  | 19 |
| E113       | <i>Shigella</i> sp.         | R          | 0          | S        | 30           | S          | 32         | S             | 17 |   | -  | R  | 0  | R  | 14 |
| E126       | <i>Stenotrophomonas</i> sp. |            | 0          |          | 8            |            | 0          |               | 9  |   | -  |    | 13 |    | 14 |

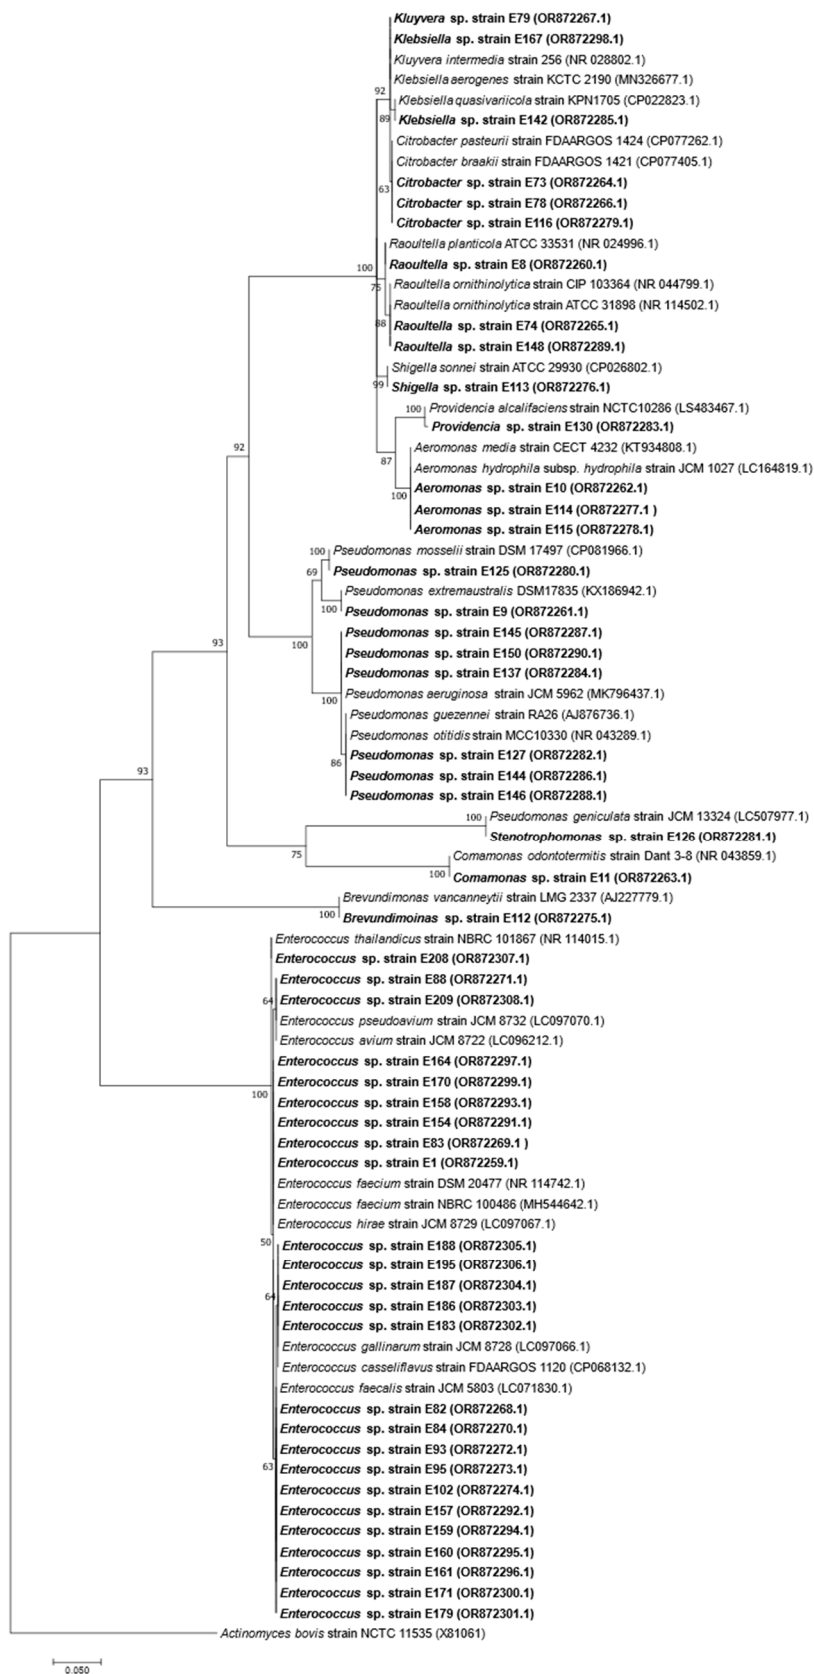

**Supplementary Figure S1.** Phylogenetic 16S rRNA gene sequence-based dendrogram of isolates from the WWTP and closest type strains. *Actinomyces bovis* strain NCTC 11535 was used as an outgroup. The scale bar refers to 0.05 substitutions per nucleotide position.

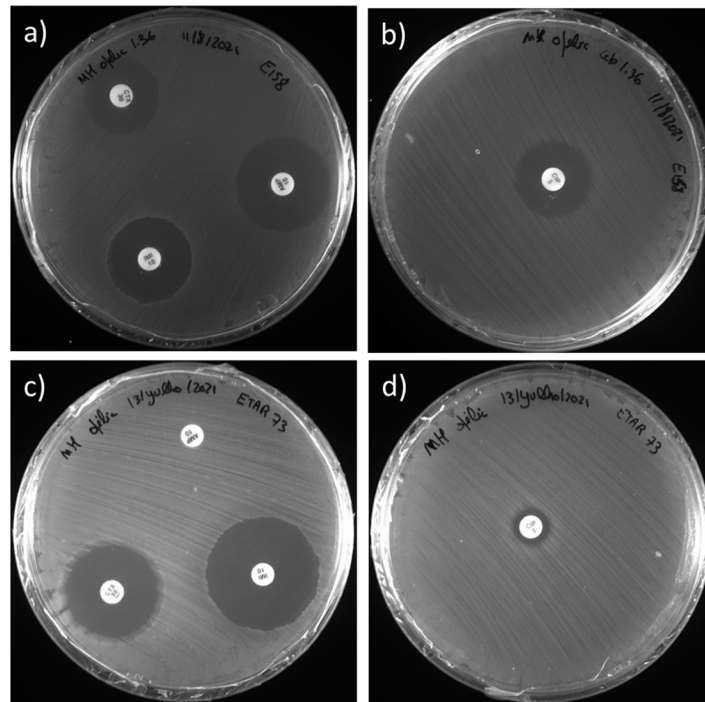

**Supplementary Figure S2.** Examples of the results of the antibiotic susceptibility assays: a) and b) for a susceptible strain *Enterococcus* sp. E158; c) and d) for a multidrug resistant strain, *Citrobacter* sp. E73.

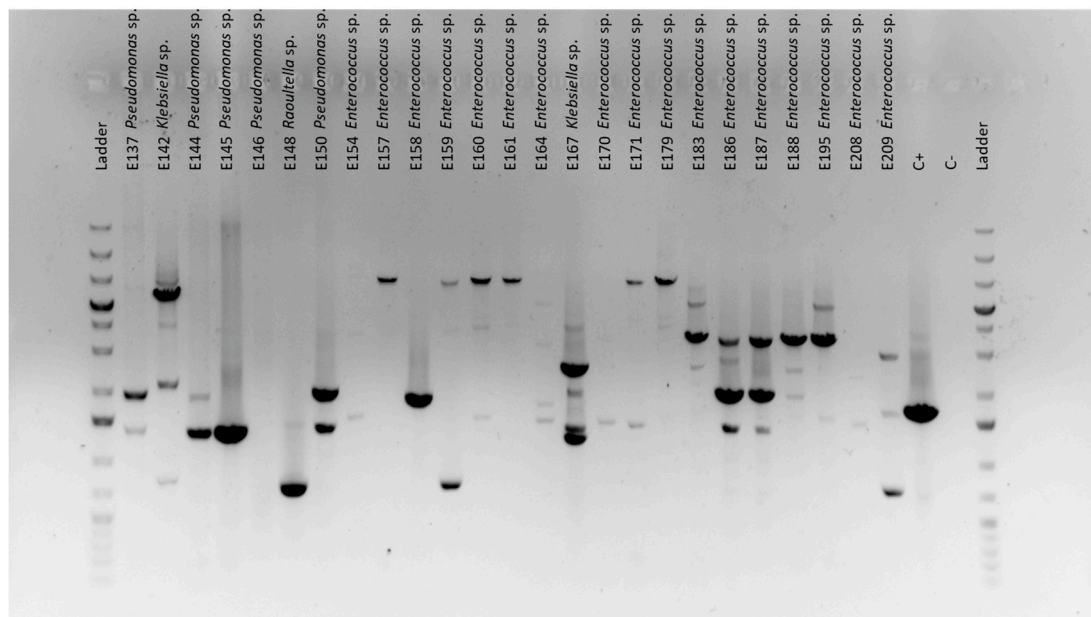

**Supplementary Figure S3.** Example of representative gel electrophoresis for PCR amplification of class 1 integron.
